# Supplementary material
Source: PubMed Central journal article supplement (PMC3655141)
Supplement: NIHMS431736-supplement-1.pdf [file NIHMS431736-supplement-1.pdf]

# Deyle Supplemental Figure 1

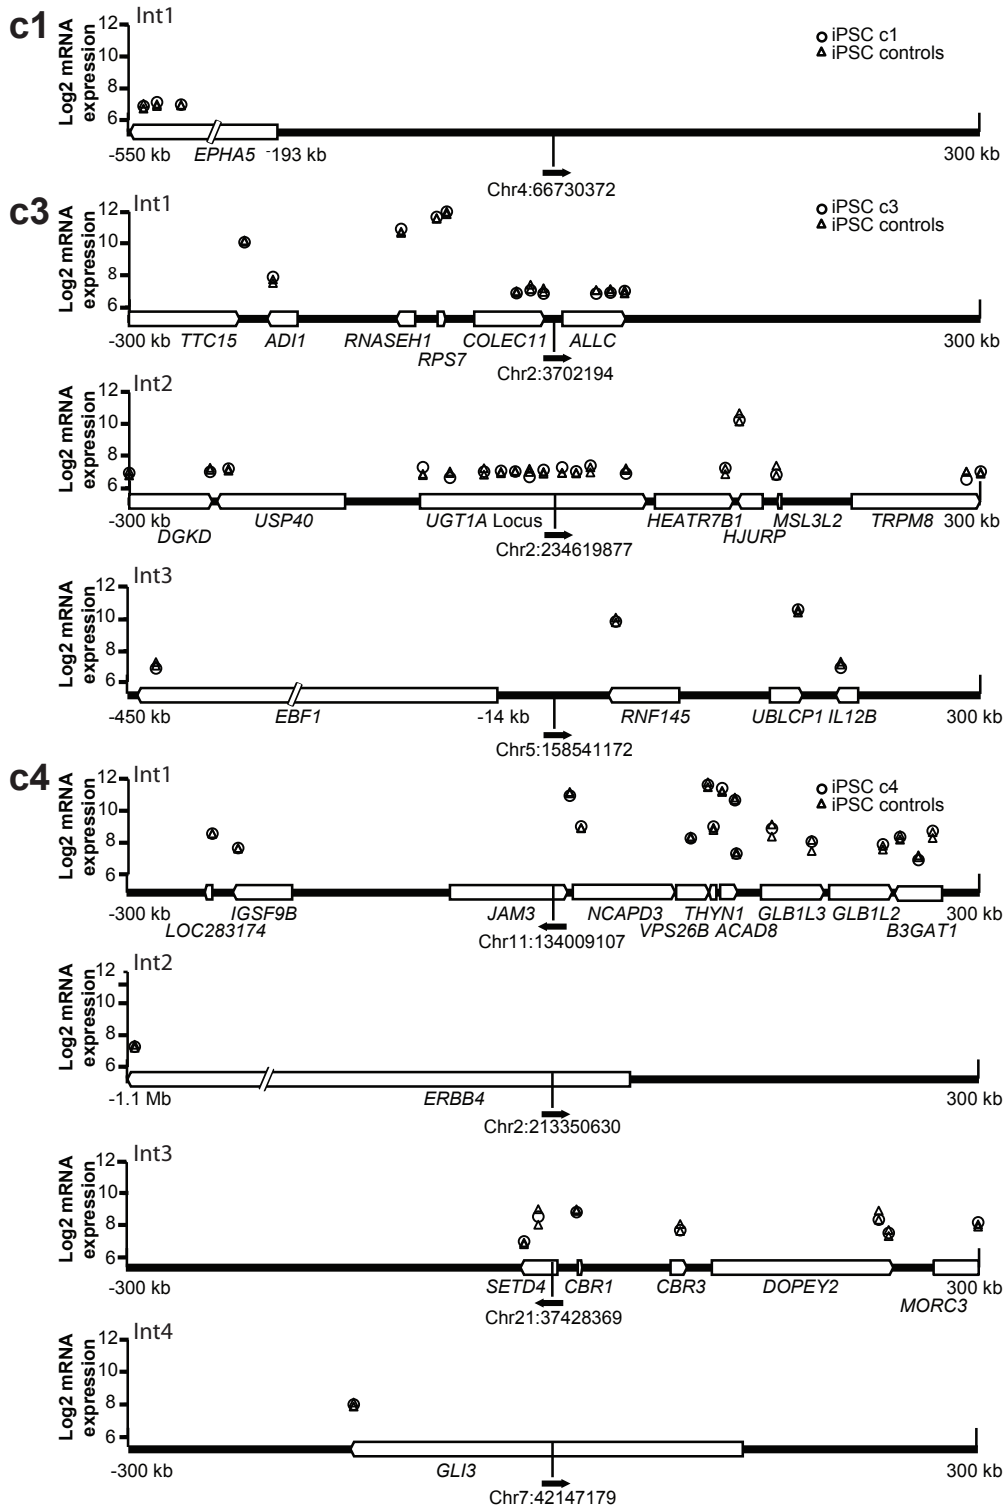

**Supplemental Figure 1. Provirus locations and neighboring gene expression in undifferentiated iPSC lines.** The vector proviruses found in each clone are shown with chromosomal location (February 2009 freeze of the human (hg19) genome) and a solid black arrow in the direction of vector transcription. Cellular genes within a 300 kb window up- or downstream of each provirus are shown as white block arrows in the direction of transcription. Microarray probe signal levels are shown above their chromosomal positions and as log<sub>2</sub> values. Probe signals from the iPSC clone containing the integrant (○) was compared to the remaining two iPSC clones as controls (△). Int1-Int4 identifies distinct integration sites within each clone.
